# Supplementary material for: Highly flexible metabolism of the marine euglenozoan protist Diplonema papillatum
Source: PubMed Central journal article supplement (PMC8611851; doi:10.1186/s12915-021-01186-y), 2021-11-24
Supplement: 12915_2021_1186_MOESM2_ESM.pdf [file 12915_2021_1186_MOESM2_ESM.pdf]

# Highly flexible metabolism of the marine euglenozoan protist *Diplonema papillatum*

Ingrid Škodová-Sveráková<sup>1,2,#,\*</sup>, Kristína Záhonová<sup>1,3,#</sup>, Valéria Juricová<sup>1,4</sup>, Maksym Danchenko<sup>5</sup>, Martin Moos<sup>6</sup>, Peter Baráth<sup>5,7</sup>, Galina Prokopchuk<sup>1</sup>, Anzhelika Butenko<sup>1,8</sup>, Veronika Lukáčová<sup>7</sup>, Lenka Kohútová<sup>5</sup>, Barbora Bučková<sup>2</sup>, Aleš Horák<sup>1,4</sup>, Drahomíra Faktorová<sup>1,4</sup>, Anton Horváth<sup>2</sup>, Petr Šimek<sup>6</sup>, and Julius Lukeš<sup>1,4,\*</sup>

<sup>1</sup> Institute of Parasitology, Biology Centre, Czech Academy of Sciences, České Budějovice (Budweis), Czech Republic

<sup>2</sup> Faculty of Natural Sciences, Comenius University, Bratislava, Slovakia

<sup>3</sup> Faculty of Science, Charles University, BIOCEV, Vestec, Czech Republic

<sup>4</sup> Faculty of Sciences, University of South Bohemia, České Budějovice (Budweis), Czech Republic

<sup>5</sup> Institute of Chemistry, Slovak Academy of Sciences, Bratislava, Slovakia

<sup>6</sup> Institute of Entomology, Biology Centre, Czech Academy of Sciences, České Budějovice (Budweis), Czech Republic

<sup>7</sup> Medirex Group Academy, n.o., Trnava, Slovakia

<sup>8</sup> Faculty of Science, University of Ostrava, Ostrava, Czech Republic

# These authors contributed equally to this work

\*Corresponding authors: [jula@paru.cas.cz](mailto:jula@paru.cas.cz); [skodovaister@gmail.com](mailto:skodovaister@gmail.com)

**Additional file 2: Files S1-S3**

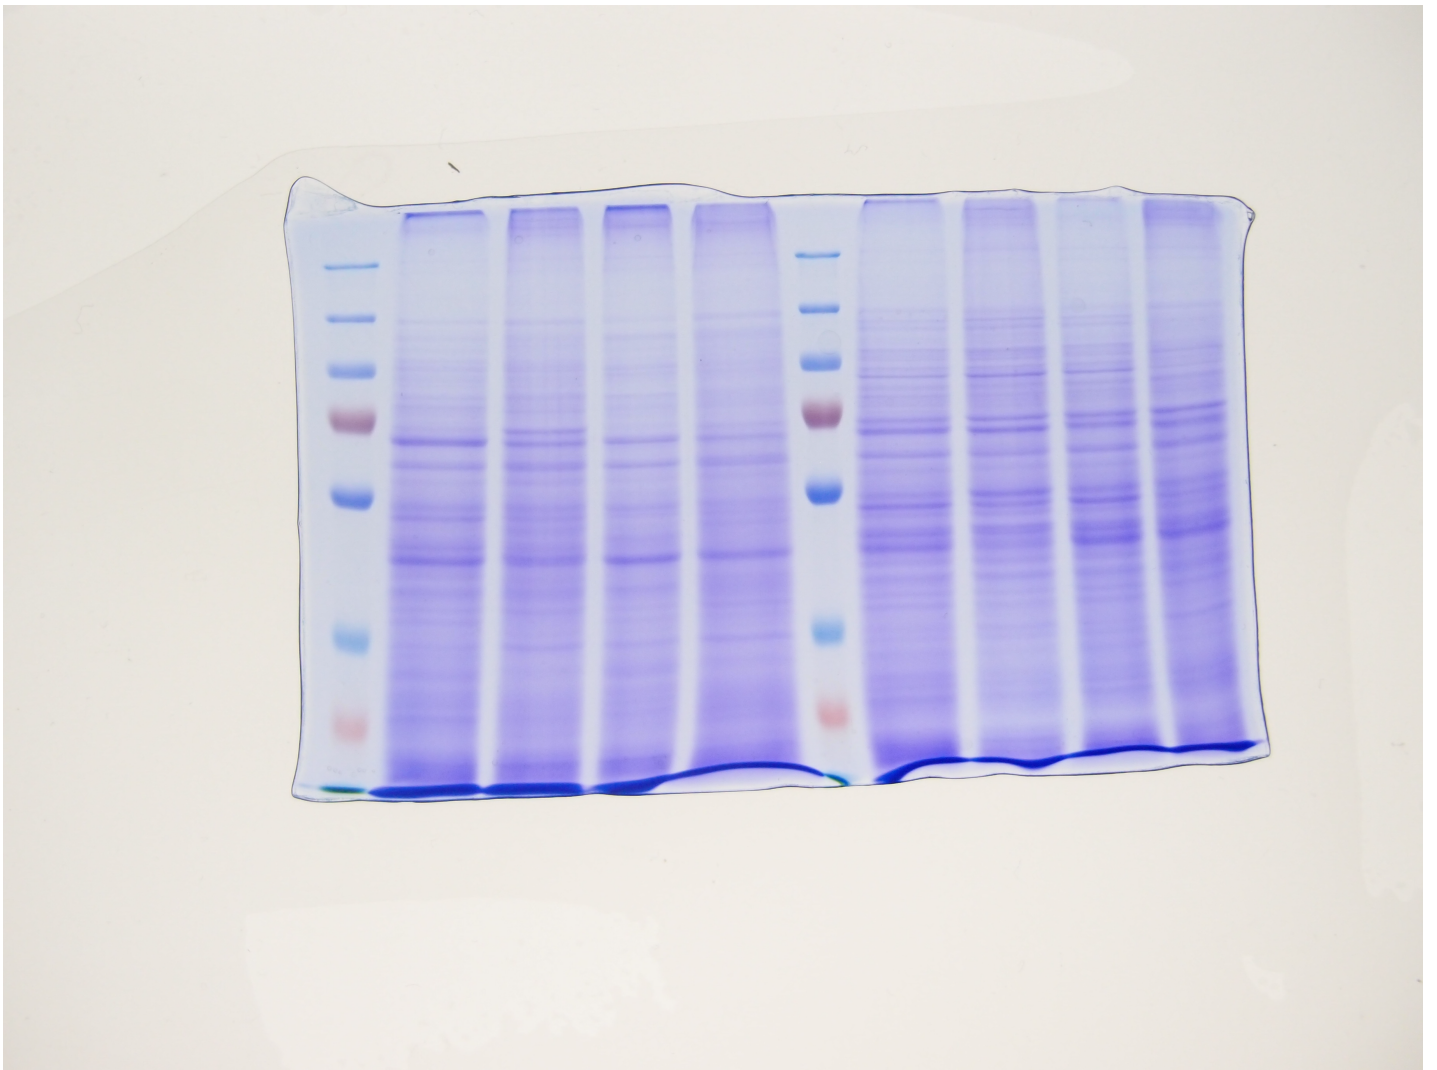

**File S1. Original gel of Coomassie-stained SDS-PAGE.** Lanes 2-5 correspond to protein profiles shown in Fig. 1D.

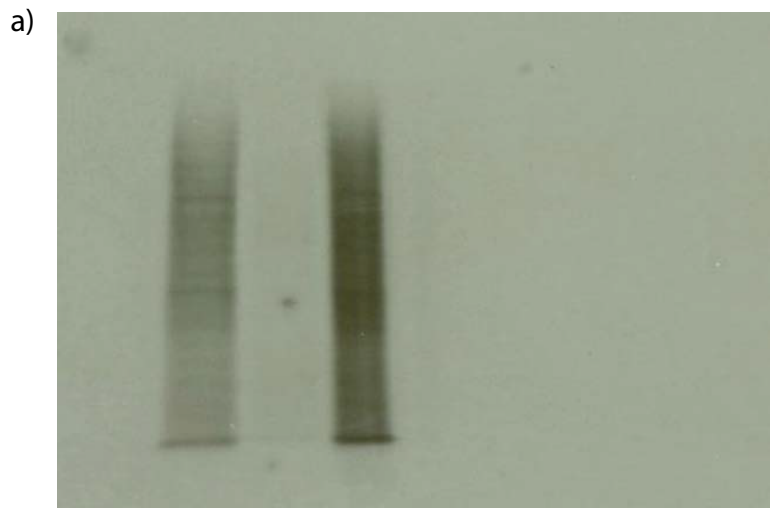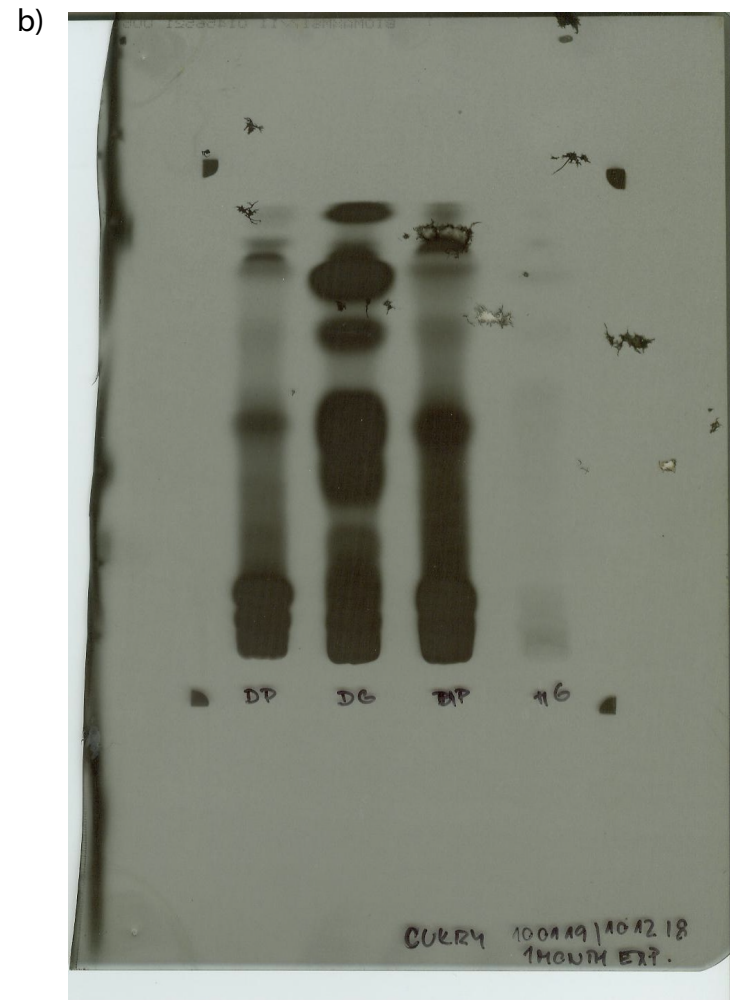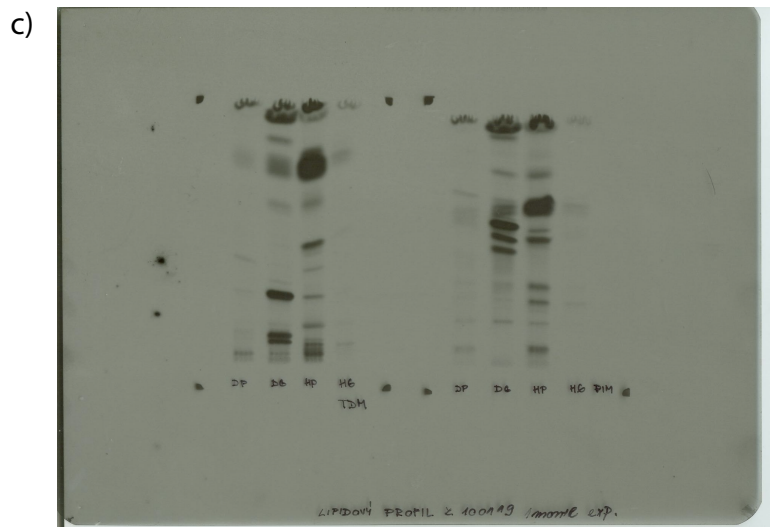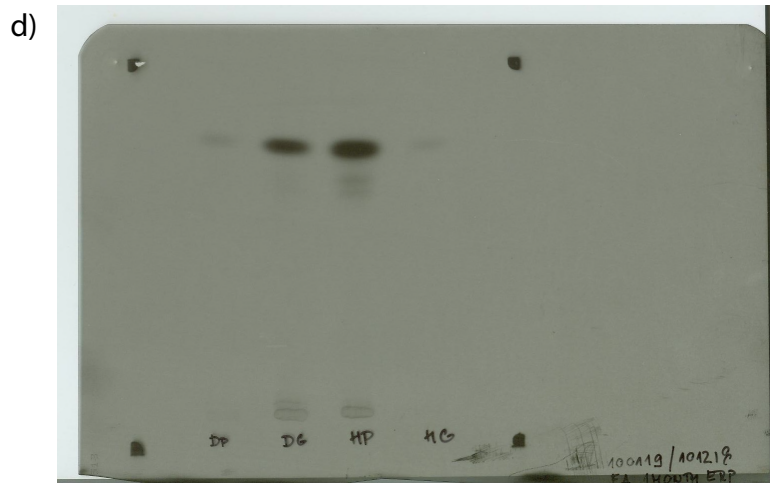

**File S2. Original autoradiograms.** Lanes 3-4 of  $^{14}\text{C}$ -labelled proteins (**a**), monosaccharides (**b**), lipids (**c**), and fatty acids (**d**) are shown in Additional file 1: Fig. S3A.

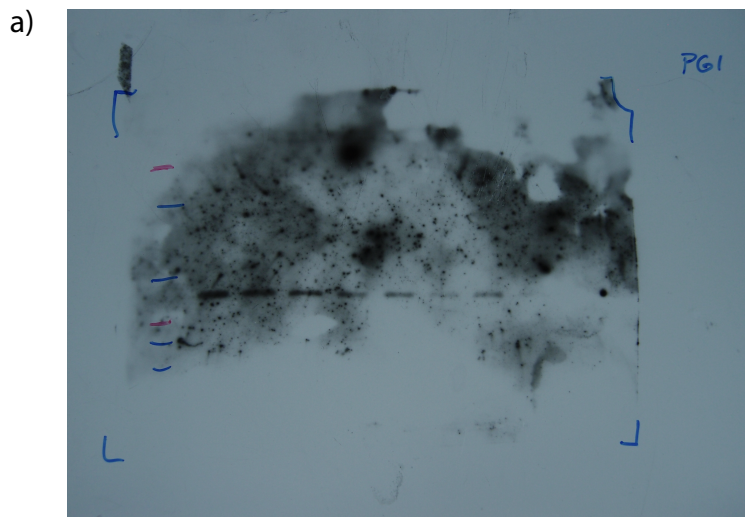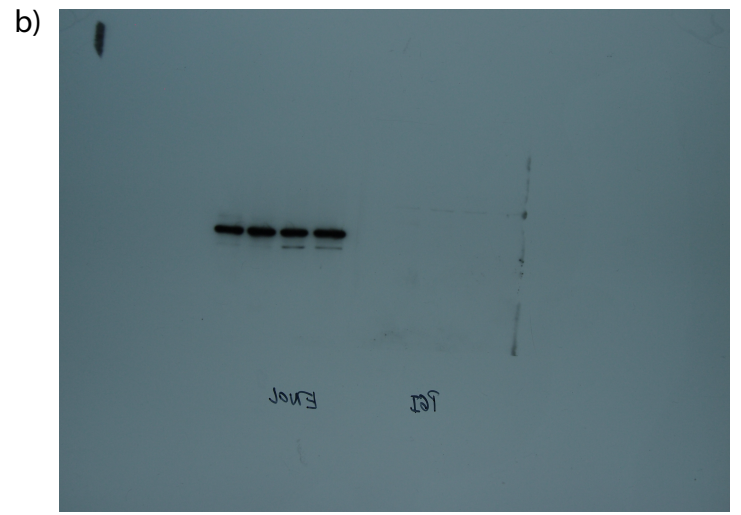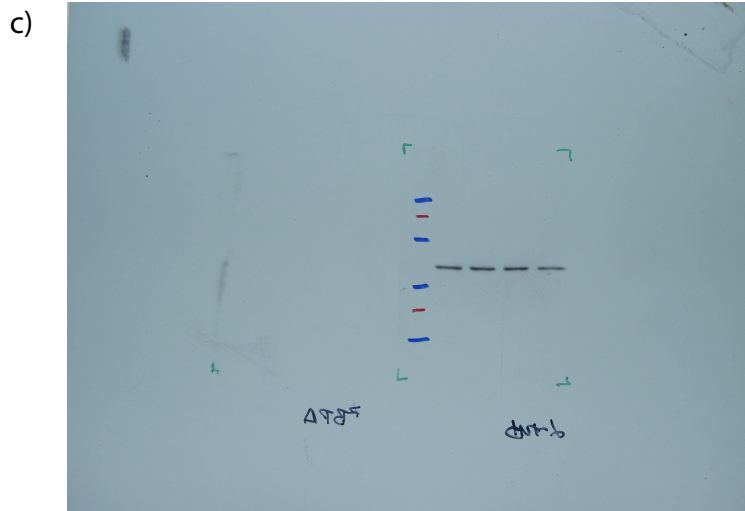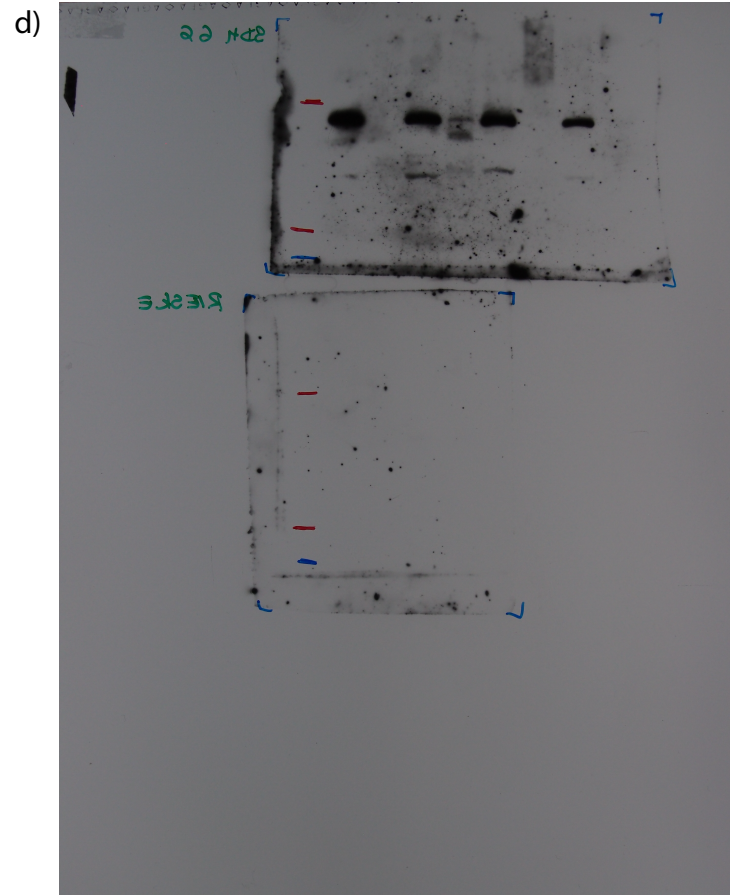

**File S3. Original western blots.** Lanes 6-9, 1-4, 2-5, and 2-5 of immunodetected phosphoglucose isomerase (**a**), enolase (**b**),  $\alpha$ -tubulin (**c**), and succinate dehydrogenase subunit I (**d**), respectively, are shown in Fig. 5.
