# Supplementary material for: Highly flexible metabolism of the marine euglenozoan protist Diplonema papillatum
Source: PubMed Central journal article supplement (PMC8611851; doi:10.1186/s12915-021-01186-y), 2021-11-24
Supplement: 12915_2021_1186_MOESM6_ESM.pdf [file 12915_2021_1186_MOESM6_ESM.pdf]

## Highly flexible metabolism of the marine euglenozoan protist *Diplonema papillatum*

Ingrid Škodová-Sveráková<sup>1,2,#,\*</sup>, Kristína Záhonová<sup>1,3,#</sup>, Valéria Juricová<sup>1,4</sup>, Maksym Danchenko<sup>5</sup>, Martin Moos<sup>6</sup>, Peter Baráth<sup>5,7</sup>, Galina Prokopchuk<sup>1</sup>, Anzhelika Butenko<sup>1,8</sup>, Veronika Lukáčová<sup>7</sup>, Lenka Kohútová<sup>5</sup>, Barbora Bučková<sup>2</sup>, Aleš Horák<sup>1,4</sup>, Drahomíra Faktorová<sup>1,4</sup>, Anton Horváth<sup>2</sup>, Petr Šimek<sup>6</sup>, and Julius Lukeš<sup>1,4,\*</sup>

<sup>1</sup> Institute of Parasitology, Biology Centre, Czech Academy of Sciences, České Budějovice (Budweis), Czech Republic

<sup>2</sup> Faculty of Natural Sciences, Comenius University, Bratislava, Slovakia

<sup>3</sup> Faculty of Science, Charles University, BIOCEV, Vestec, Czech Republic

<sup>4</sup> Faculty of Sciences, University of South Bohemia, České Budějovice (Budweis), Czech Republic

<sup>5</sup> Institute of Chemistry, Slovak Academy of Sciences, Bratislava, Slovakia

<sup>6</sup> Institute of Entomology, Biology Centre, Czech Academy of Sciences, České Budějovice (Budweis), Czech Republic

<sup>7</sup> Medirex Group Academy, n.o., Trnava, Slovakia

<sup>8</sup> Faculty of Science, University of Ostrava, Ostrava, Czech Republic

# These authors contributed equally to this work

\*Corresponding authors: jula@paru.cas.cz; skodovaister@gmail.com

### Additional file 6

**Data S1. Identification and annotation of the uncommon metabolites of *Diplonema papillatum* by LC-HRMS analysis.**

A) Gonyol, posESI HRMS, CID MS/MS spectrum,  $[M+H]^+ = 179.07$ .

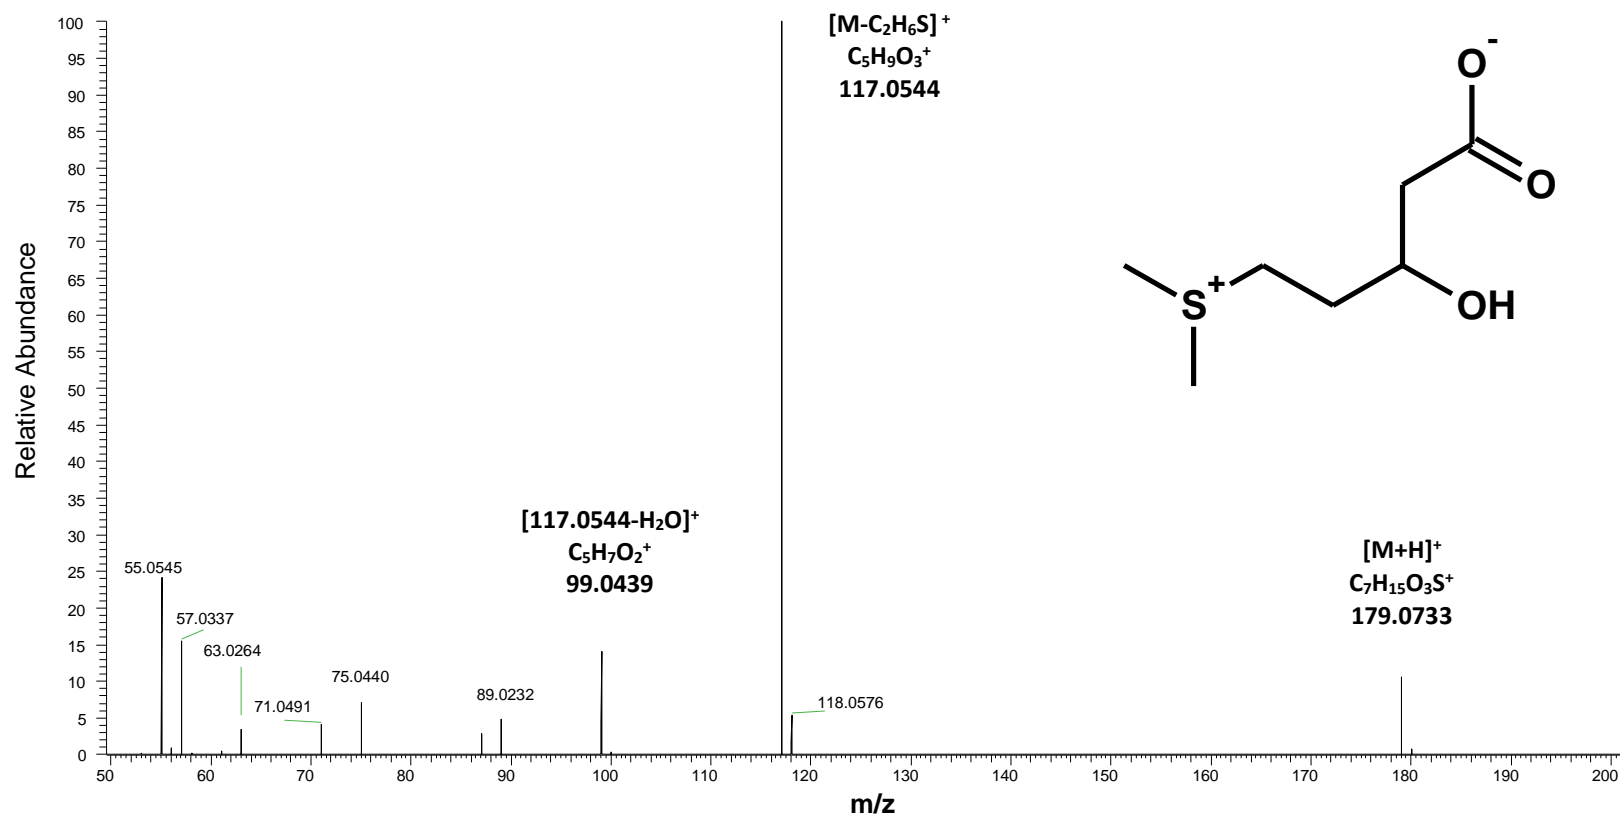

The recorded MS/MS data correspond to the Gonyol data reported in reference [S11-R1].

**B) DMSP, posESI CID MS/MS spectrum,  $[M+H]^+ = 135.05$ .**

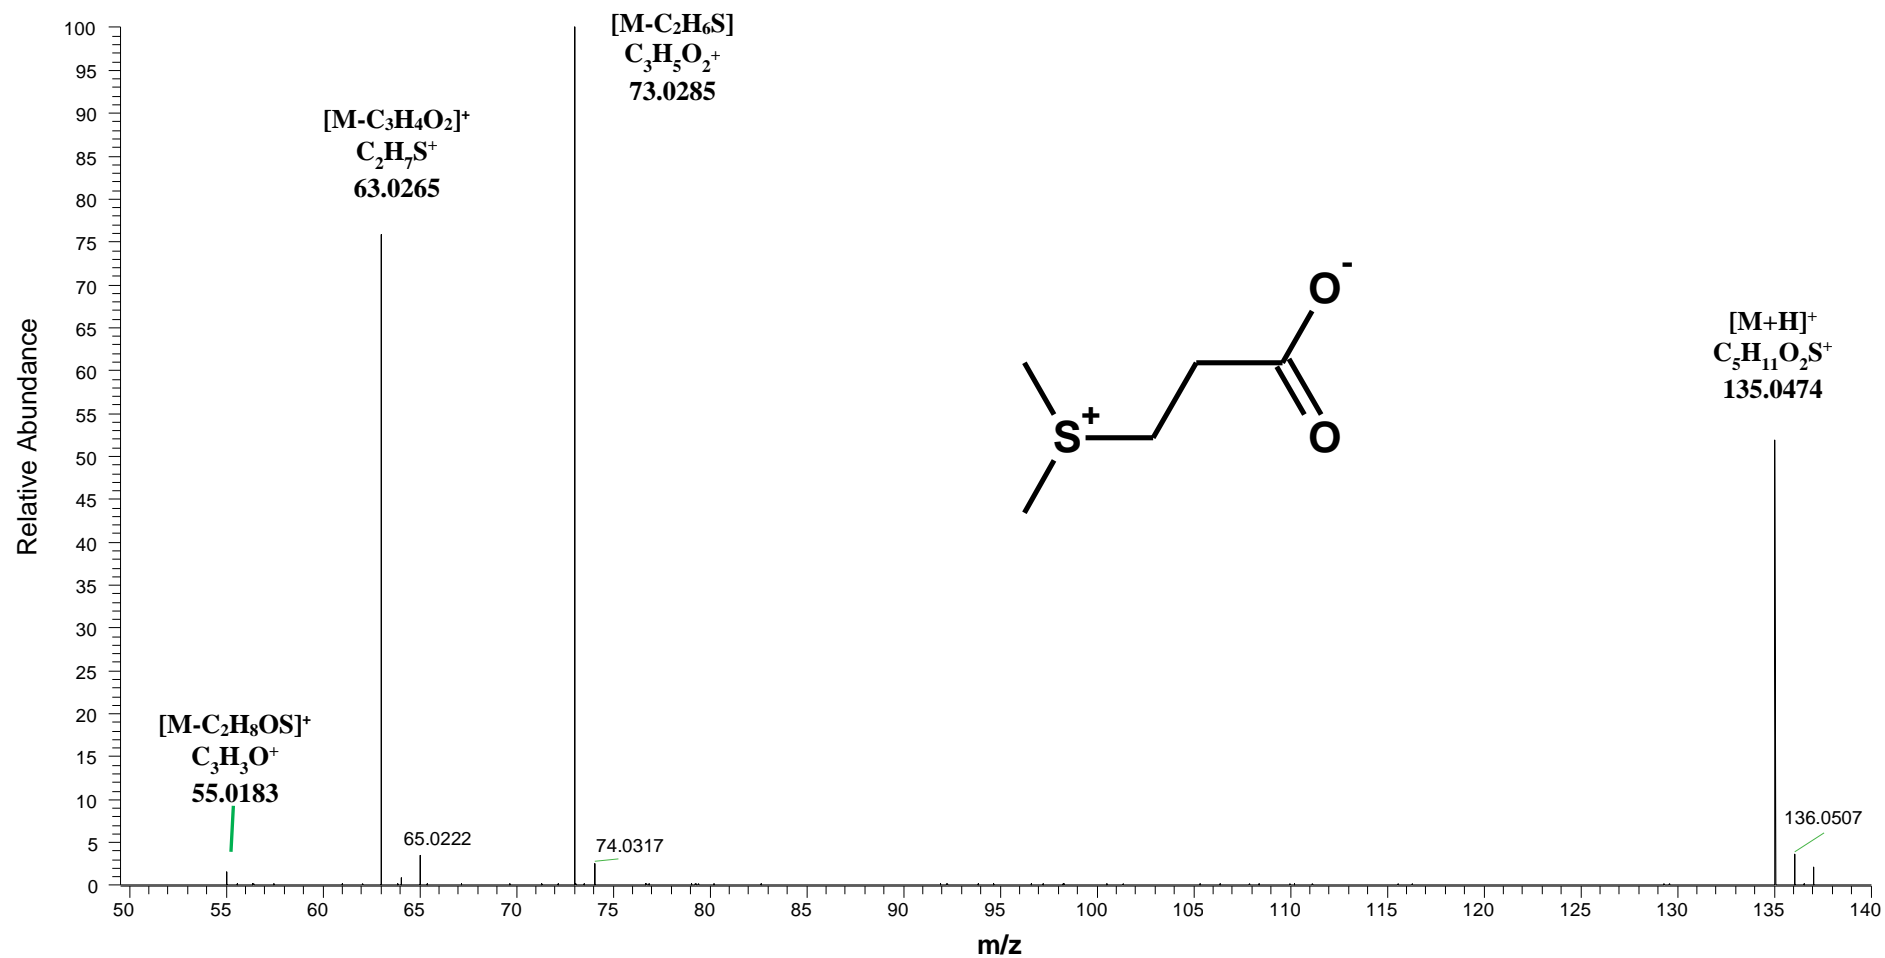

The MS/MS spectrum is in accordance with the data presented in reference [S11-R2].

**C) Dimethylseleniopropionate (DMSeP),** a background subtracted posESI HRMS spectrum showing  $[M+H]^+ = 182.9919$ . All most abundant selenium isotopes ranging from  $^{76}\text{Se}$  to  $^{82}\text{Se}$  were detected. (a) A real posESI HRMS spectrum of the P- sample showing all major stable selenium isotopes of DMSeP. (b) A theoretical isotopic envelope of the metabolite having the  $\text{C}_5\text{H}_{10}\text{O}_2\text{Se}$  elemental composition.

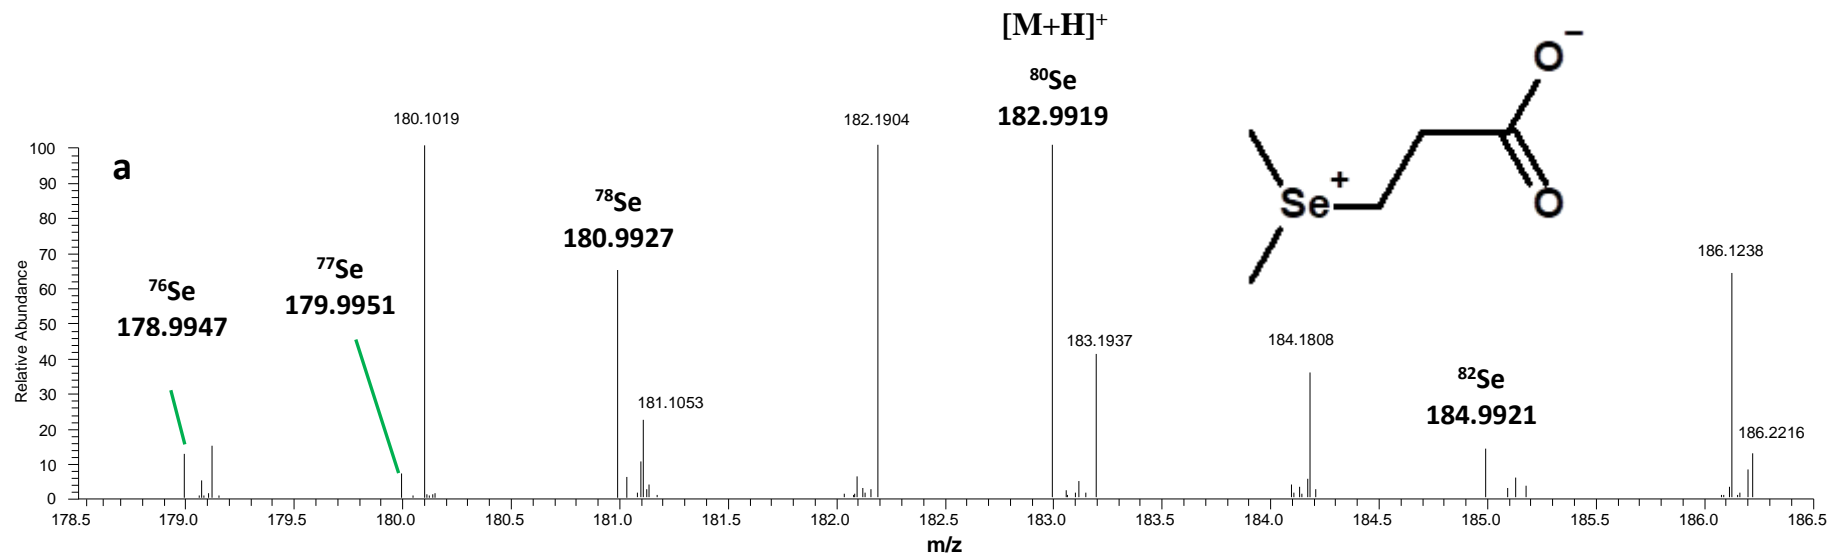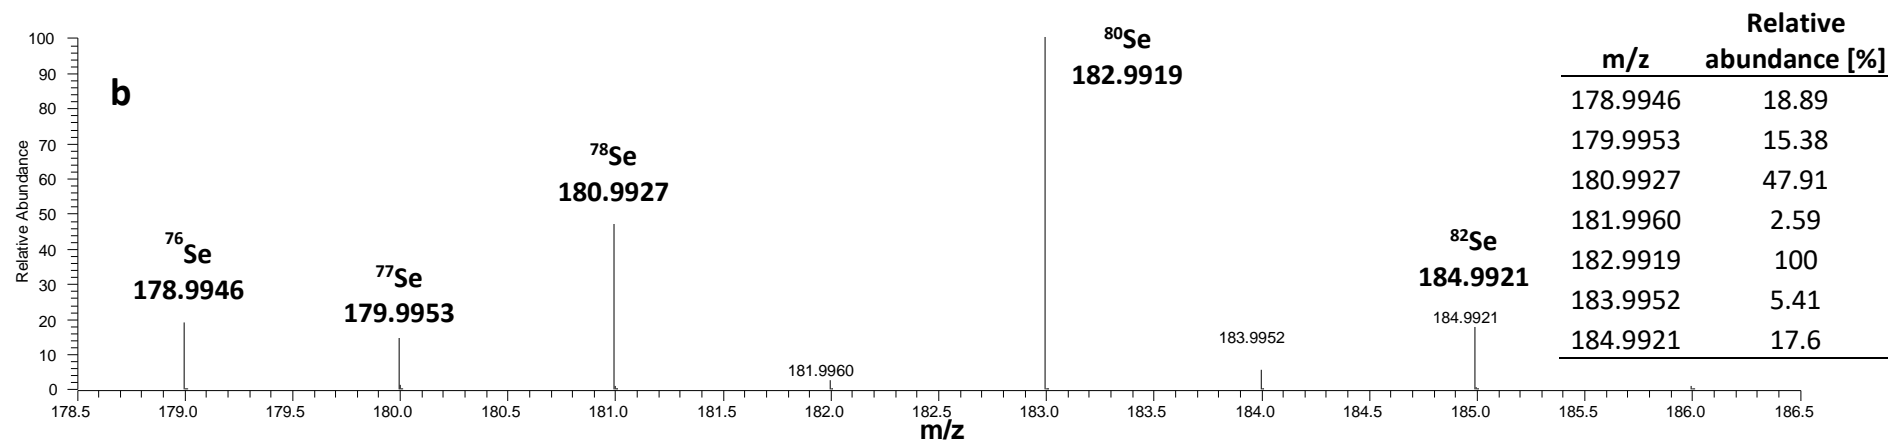

**D) Glyceromethyl-3-alanine betaine** (GMAB, UIPAC name: 3-(2,3-dihydroxypropoxy)-2-[(trimethylammonio)methyl]propanoate), posESI HRMS, CID MS/MS spectrum,  $[M+H]^+ = 236.15 \rightarrow$

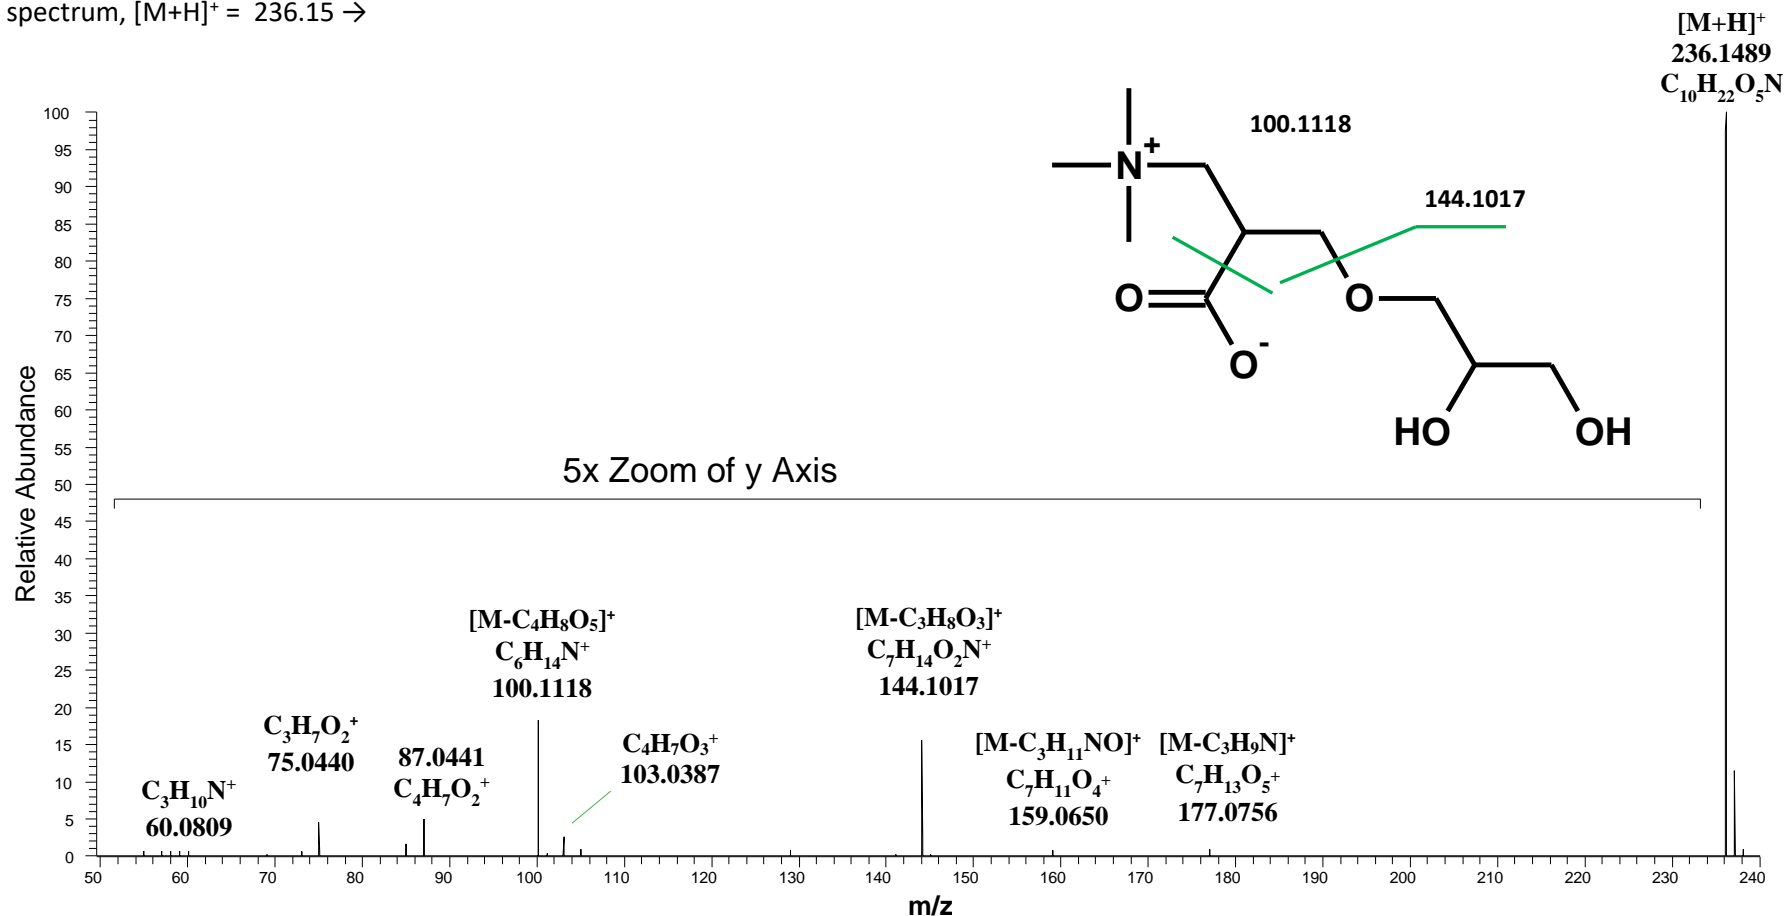

The permanent positive charge of the trimethylammonium cation directs the GMAB structure fragmentation to a glycerol loss ( $m/z$  144.1017;  $-C_3H_8O_3$ ) and decarboxylation providing a diagnostic  $m/z$   $C_6H_{14}N^+$  fragment ( $m/z$  100.1118,  $-CO_2$ , i.e.  $-43.9899$ ). A second fragmentation route is initialized by the trimethylamine loss ( $m/z$  177.0756;  $-C_3H_9N$ ) followed by consecutive double water loss ( $m/z$  159.0659, 141.0544) and finally providing fragments from the residual skeleton.

E) Glycerohomoserine betaine (GHSB), posESI HRMS, CID MS/MS spectrum,  $[M+H]^+ = 236.15 \rightarrow$

$[M+H]^+$   
236.1489  
 $C_{10}H_{22}O_5N$

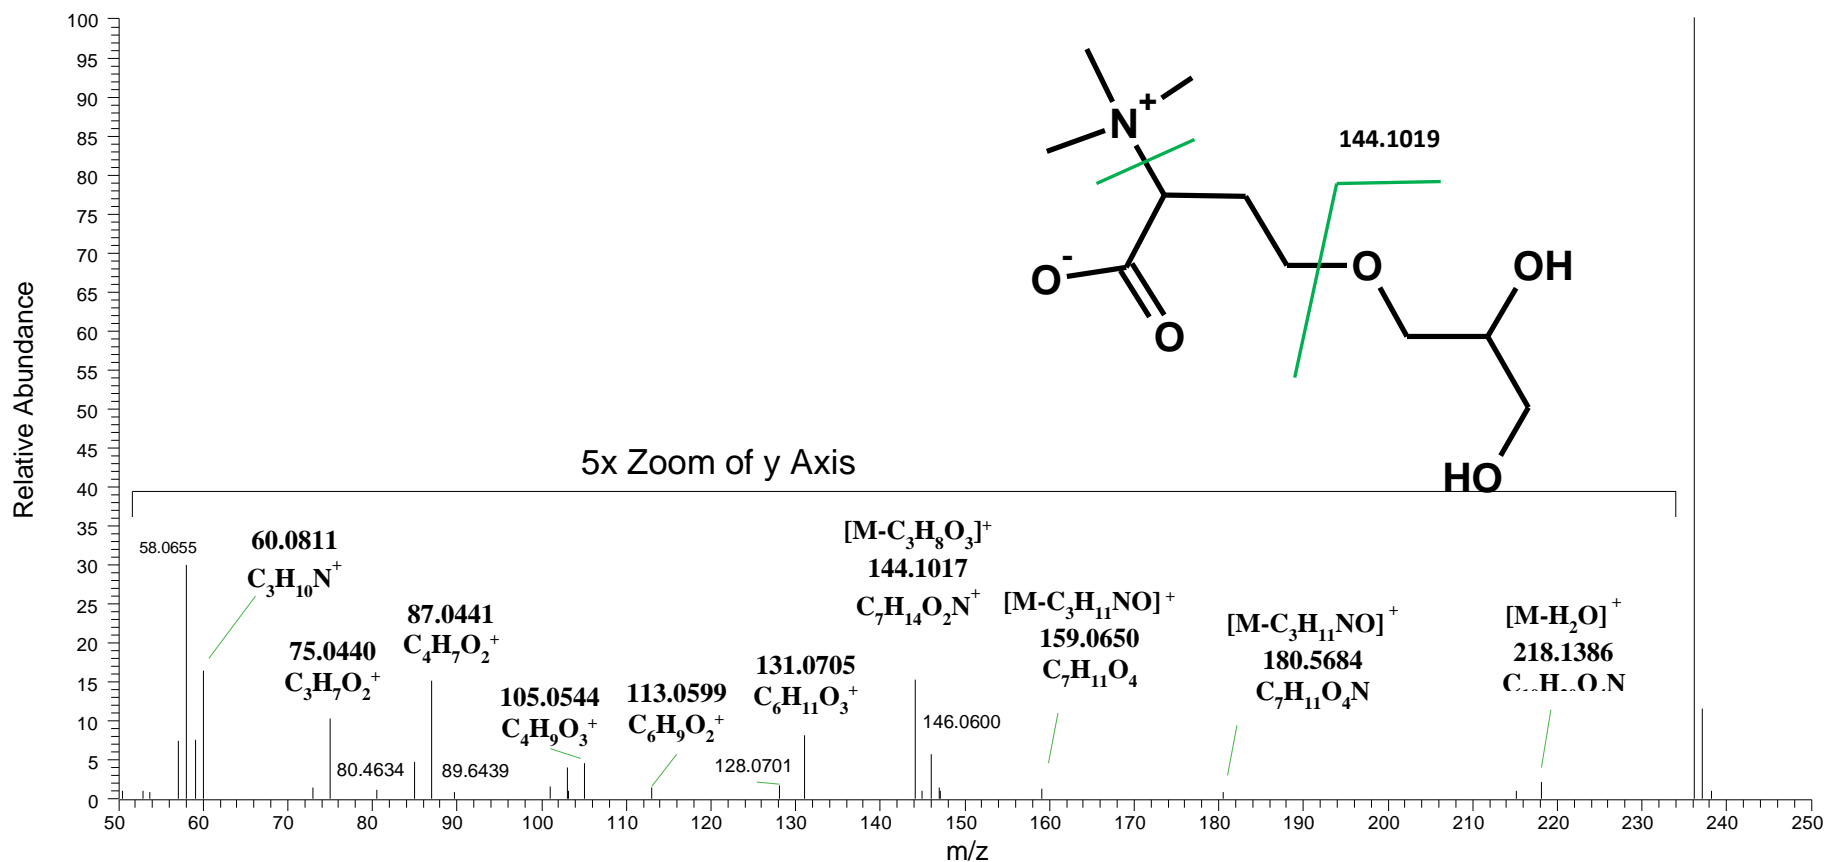

A minor detected triglycero-osmolyte **GHSB** is an isomer of **GMAB**. Its MS/MS spectrum provides again  $m/z$  144.1019 (a glycerol loss), but the main fragmentation route occurs through the losses of trimethylamine (-59,  $C_3H_9N$ ) and water ( $m/z$  159.0656,  $-H_2O$ ), followed by a carbonyl loss ( $m/z$  131.0705,  $-CO$ ), retaining the charge on the glycerol backbone. The characteristic trimethylammonium ion  $C_3H_{10}N^+$  is also detected.

F) 3-Alanopine, posESI HRMS, CID MS/MS spectrum,  $[M+H]^+ = 162.08 \rightarrow$

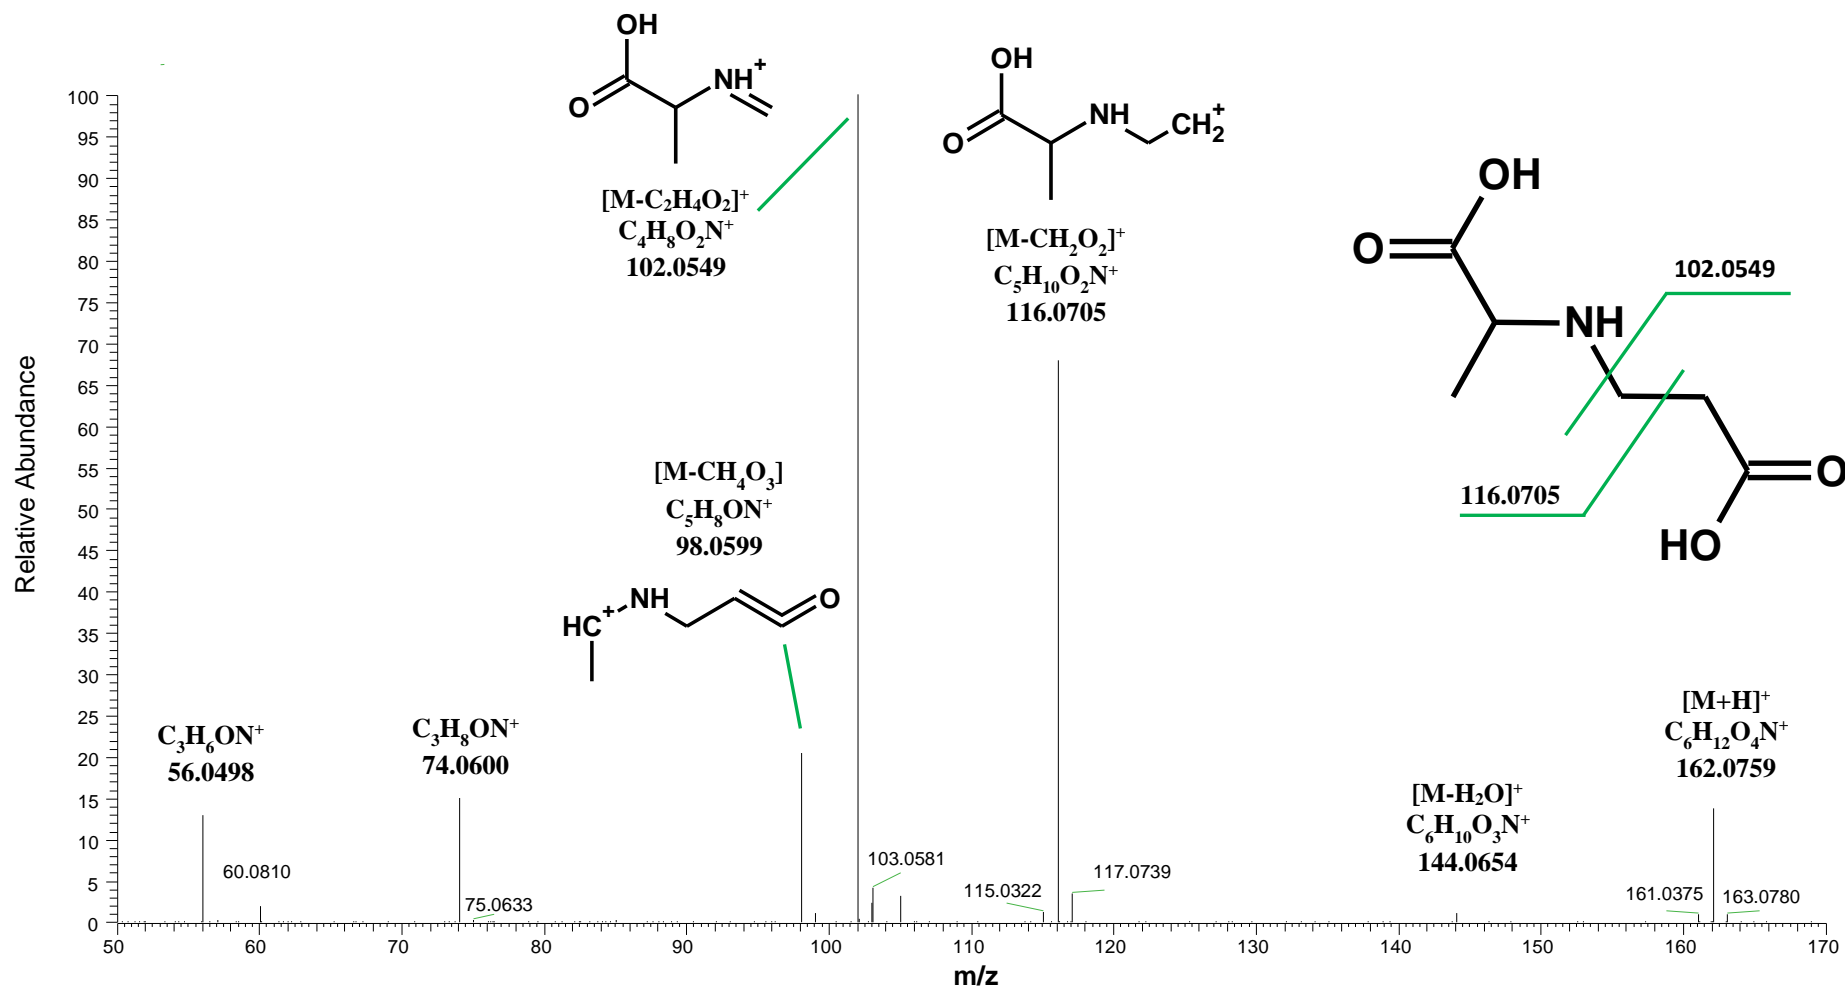

The CID MS/MS ESI spectrum was searched in open MS/MS spectral libraries, where only mass spectra of isomeric structures of 2-alanopine [Mass Bank, S11-R2], [S11-R3]; N-methylglutamate (Metlin ID 63297) and 2-aminoadipate (ID 4271) were found [S11-R4]. All possible alternative isomers provided different MS/MS spectra. The 3-alanopine ESI MS/MS spectrum provides additionally a distinct m/z 102.0549 fragment. As the chemical standard was not accessible, the 3-alanopine HRMS spectrum was consulted with the Mass Frontier 7.0 fragmentation toolbox (Thermo-Fisher Scientific, USA), which confirmed the preferred formation of this fragment in the proposed structure.

G) Taurine, negESI HRMS, CID MS/MS spectrum  $[M-H]^- = 124.01 \rightarrow$

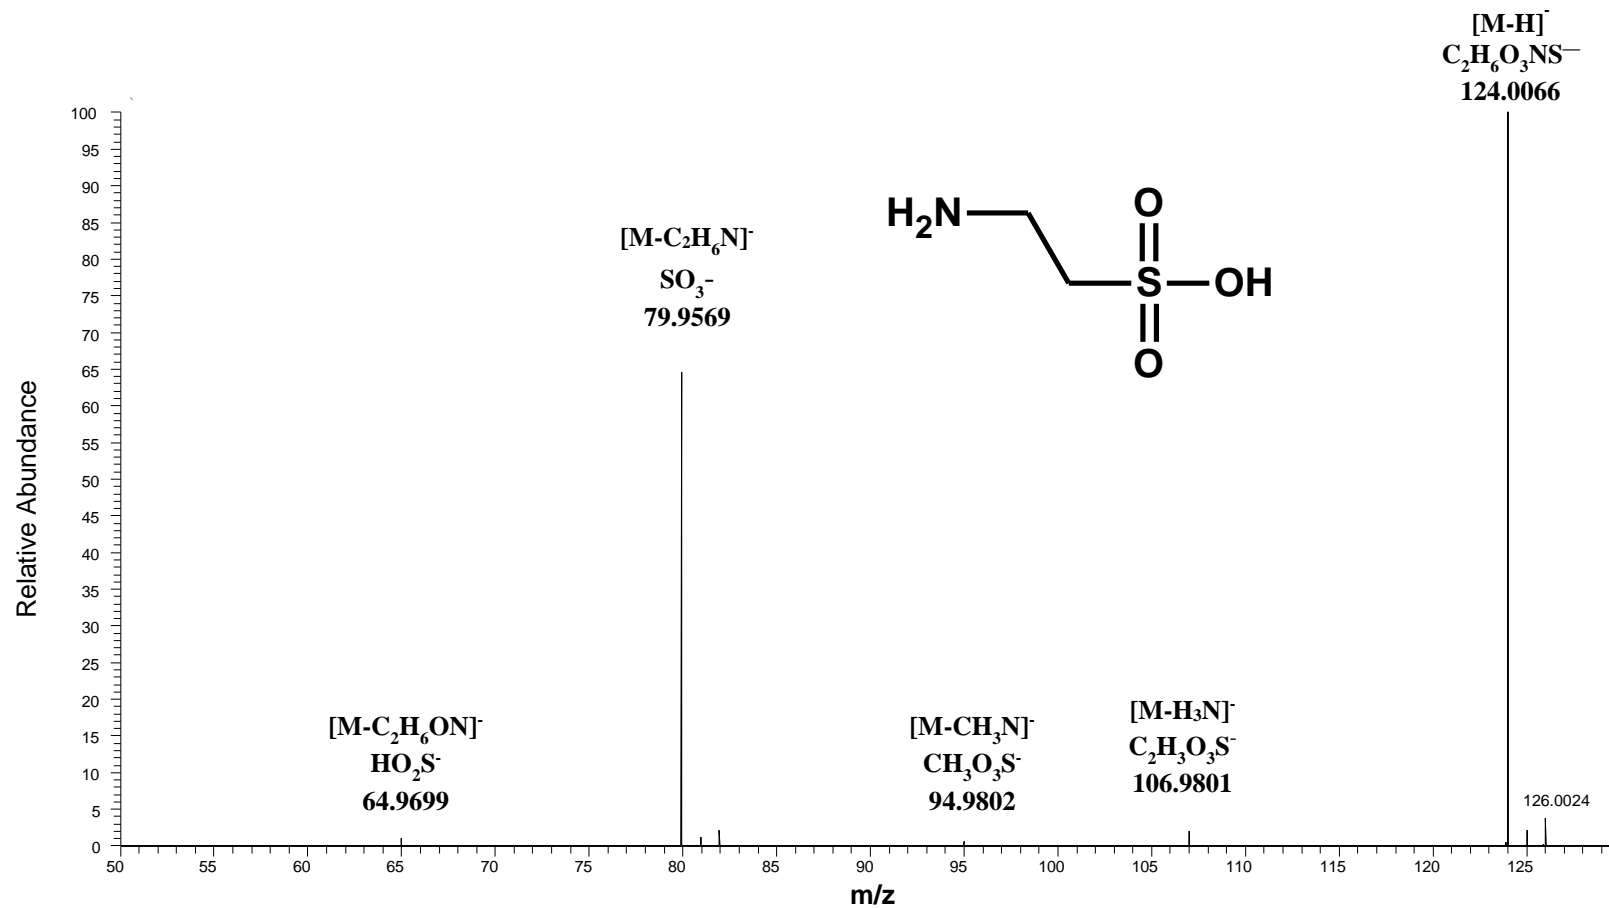



H) Taurophine, negESI HRMS, CID MS/MS spectrum,  $[M-H]^- = 196.03 \rightarrow$

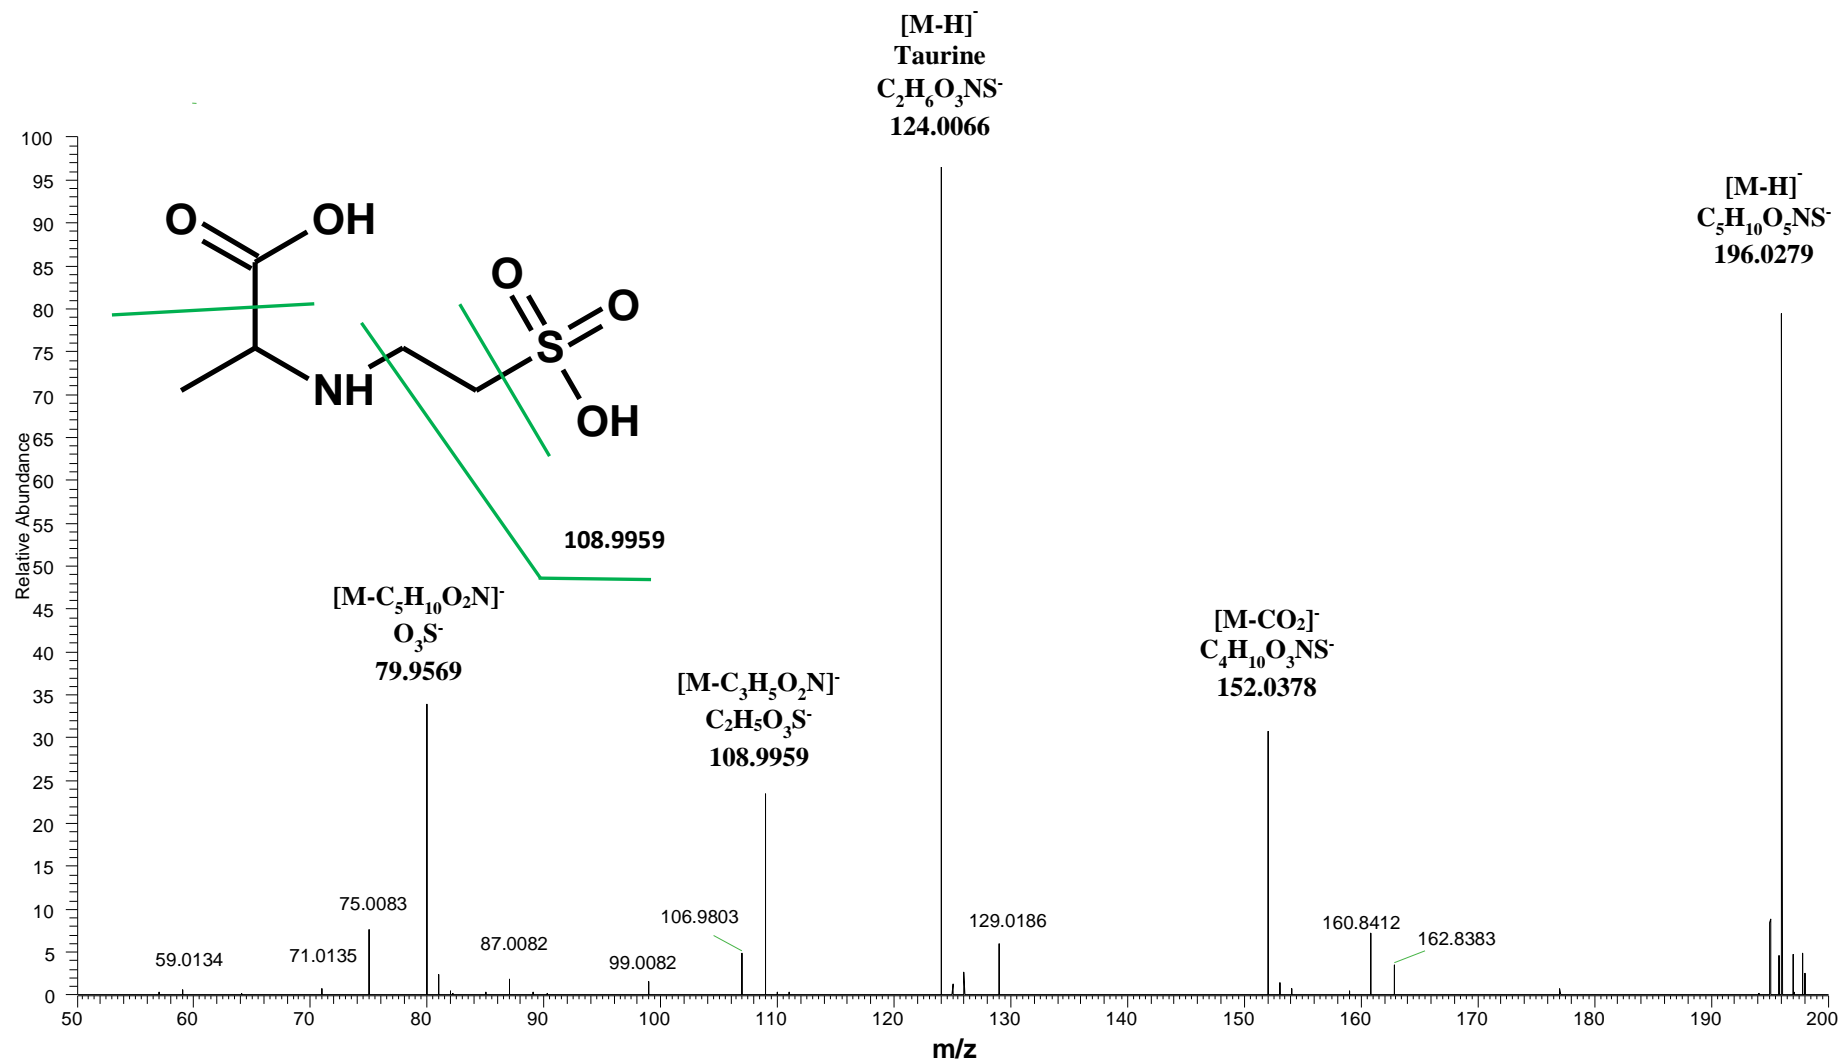

I) MGTA (C16:0, 0:0), monopalmitoylglyceromethyl-3-alanine betaine, posESI HRMS, CID MS/MS spectrum,  $[M+H]^+ = 474.38 \rightarrow$

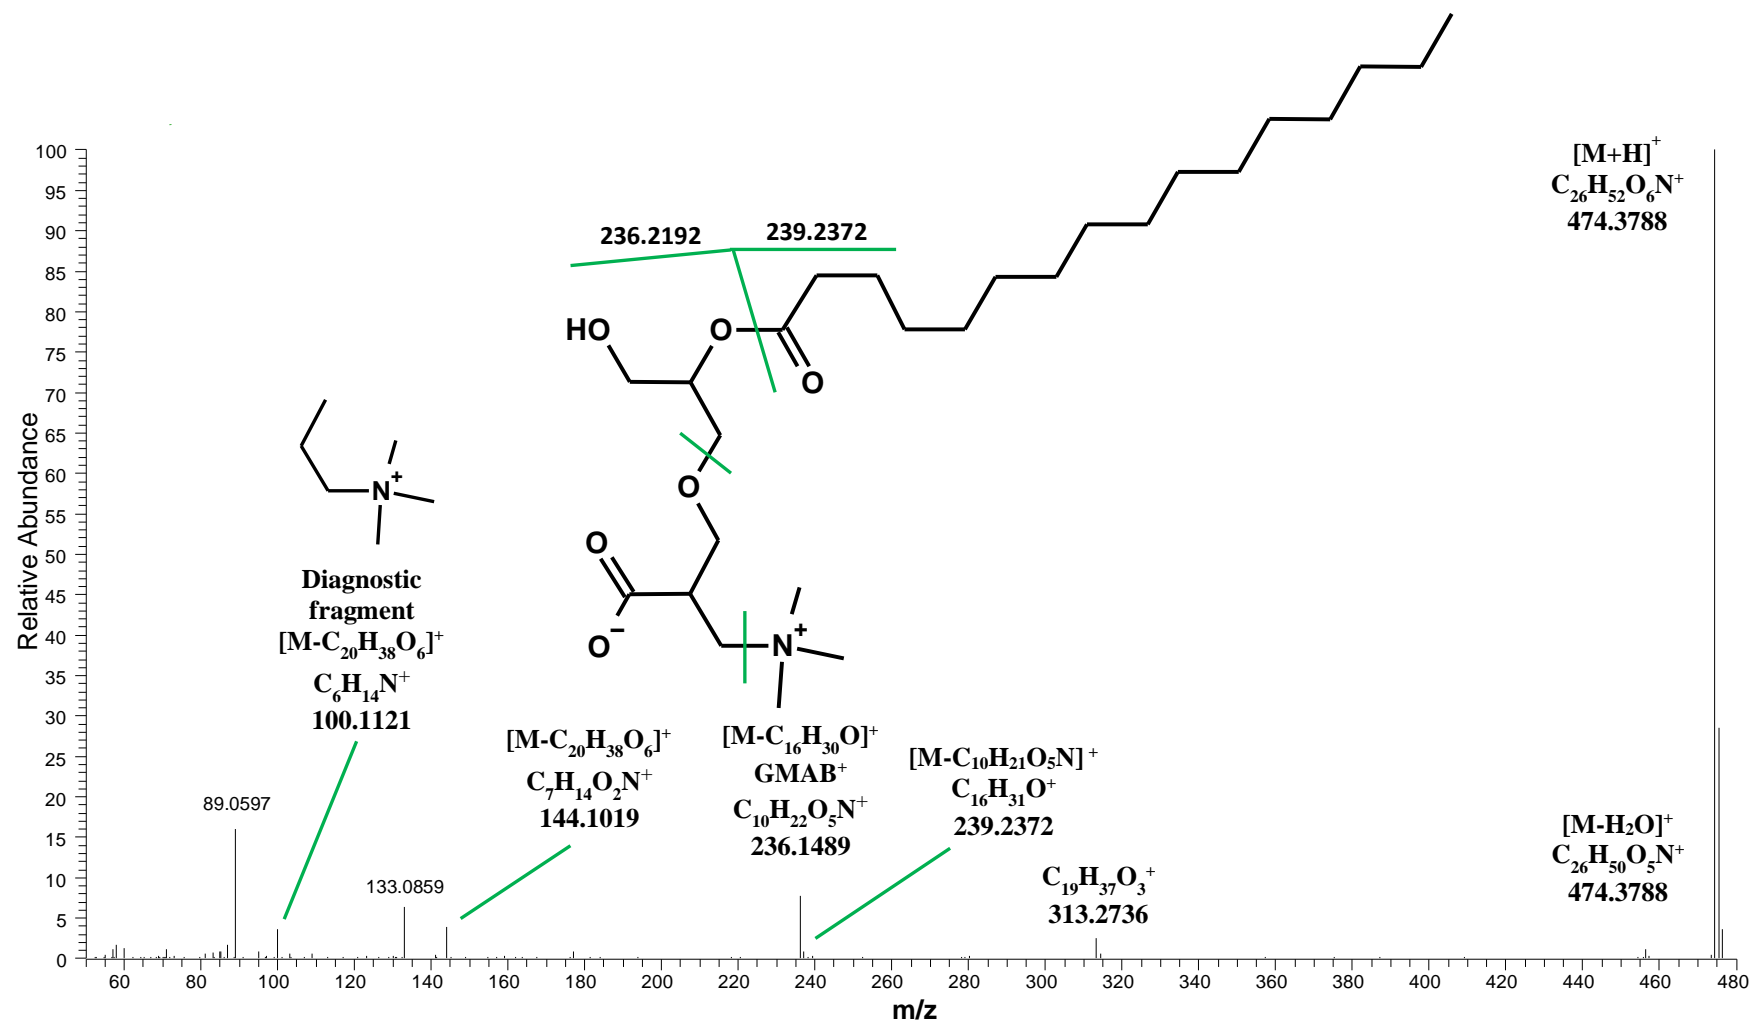

The MS/MS spectrum of the **MGTA (C16:0, 0:0)** in a pooled P+/P- sample. The GMAB diagnostic ions at the lower end of the spectrum, in particular  $m/z$  100.1121 and 144.1019 prove the structure of the N,N,N-trimethylalanine headgroup. A loss of the hexadecyl acylium ion ( $m/z$  239.24) show the C16:0 moiety in the monoacyl-betaine lipid structure.

J) LysoPC (16:0, 0:0), monopalmitoylglycerophosphocholine, posESI HRMS, CID MS/MS spectrum,  $[M+H]^+ = 496.34 \rightarrow$

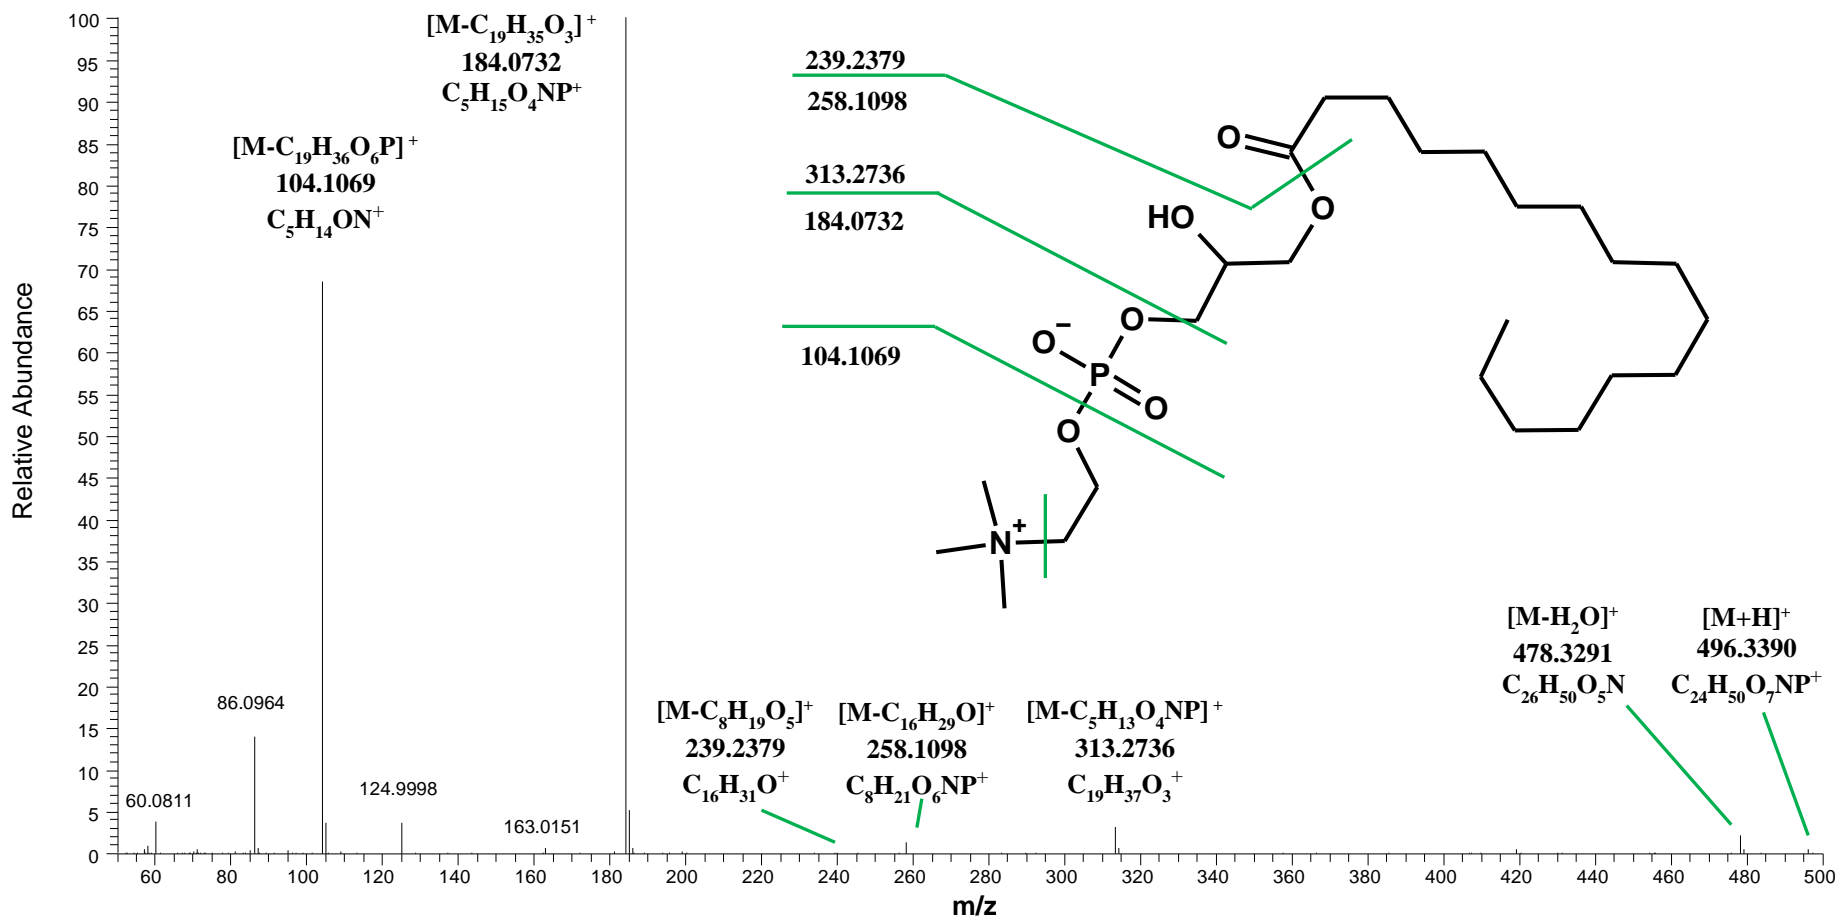

The analogous **LysoPC (16:0, 0:0)** MS/MS spectrum in a pooled R<sup>+</sup>/R<sup>-</sup> sample. The phosphocholine fragment ions dominate, the acyl moiety shows similar features as those observed in the MGTA (16:0, 0:0) MS/MS spectrum (I). For reference, e.g., refer to Metlin database, ID 182.

K) DGTA (16:0, 20:5), palmitoyl-eicosapentaenoyl-glyceromethyl-3-alanine betaine, posESI HRMS, MS/MS spectrum,  $[M+H]^+ = 758.59 \rightarrow$

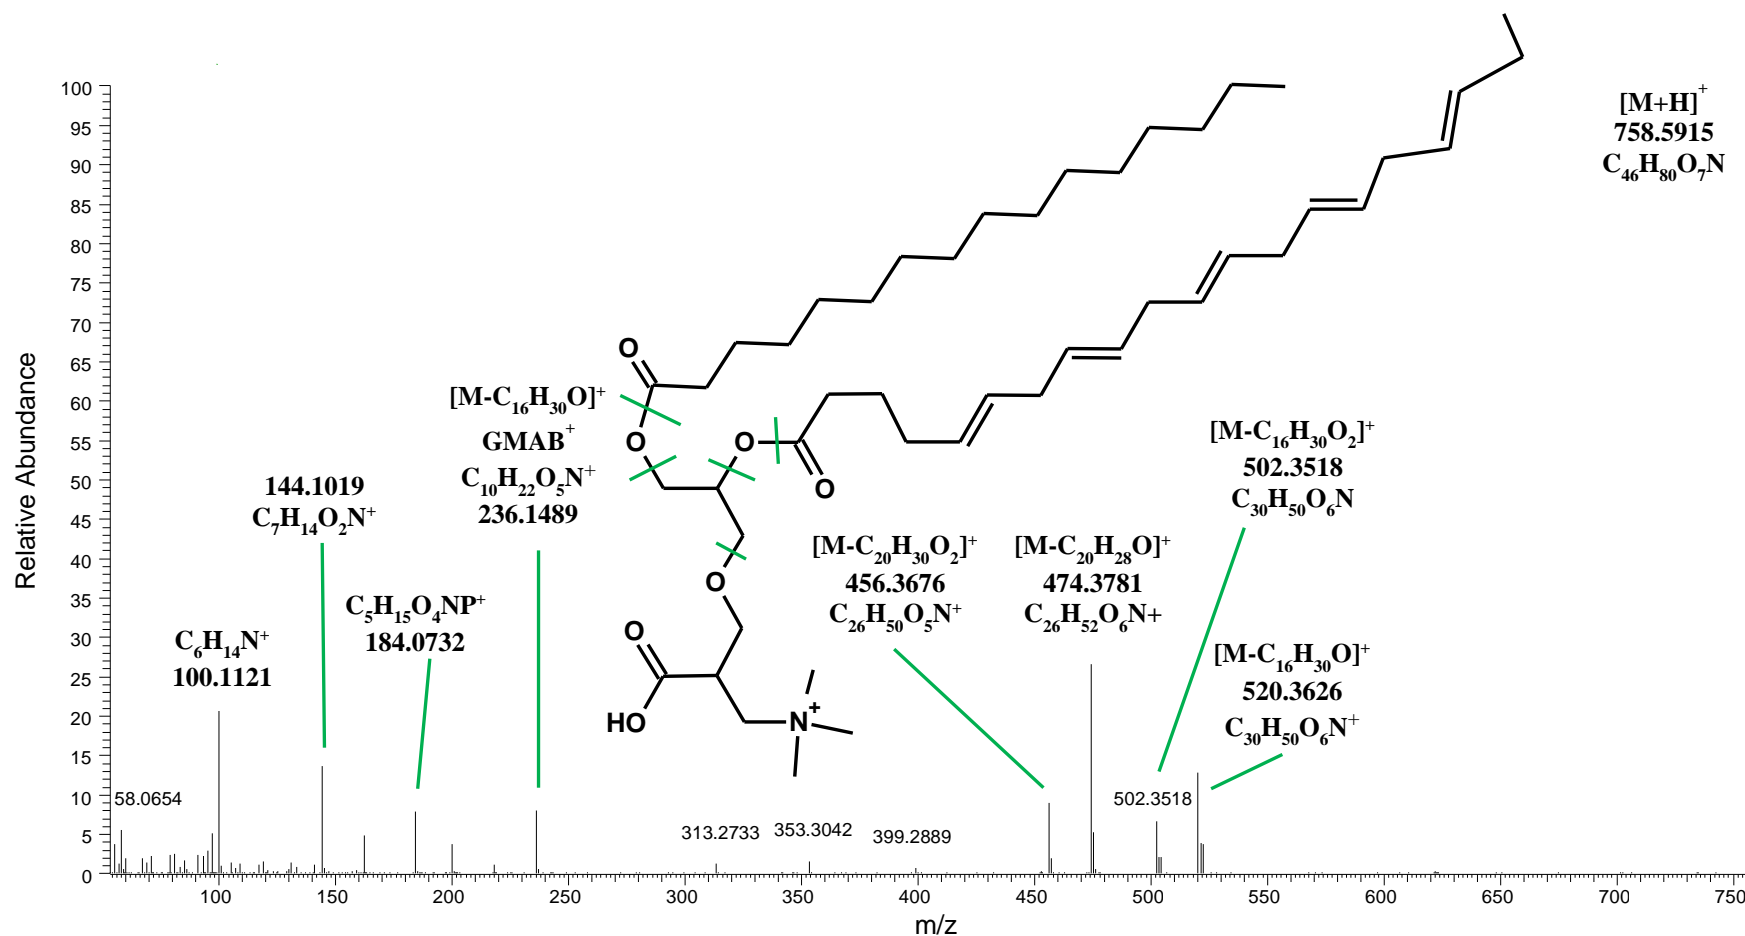

The MS/MS spectrum of the DGTA (C16:0, 20:5), which was highly abundant in a pooled R+/R- sample. The present GMAB ions at the lower end of the spectrum prove the betaine lipid GMAB structure. Typical acyl diagnostic ions  $m/z$  502.3518 (a hexadecyl ketene group loss, -238.2291, i.e. a  $C_{16}H_{30}O$  loss) and  $m/z$  520.3626 (-hexadecanoic acid, -256.397, a  $C_{16}H_{32}O_2$  loss) indicate the presence of C16:0 acyl in the lipid. Similarly, the presence of the C20:5 acyl confirms the fragments  $m/z$  456.3676 (-302.2339, a  $C_{20}H_{30}O_2$  loss) and  $m/z$  474.3781 (-284.2135, a  $C_{20}H_{28}O$  loss).

L) DGTS-d9 (16:0, 16:0), 1,2-dipalmitoylglyceryl-3-O-4'-(*N,N,N*-trimethyl)-homoserine, posESI HRMS, CID MS/MS spectrum,  $[M+H]^+ = 721.66 \rightarrow$

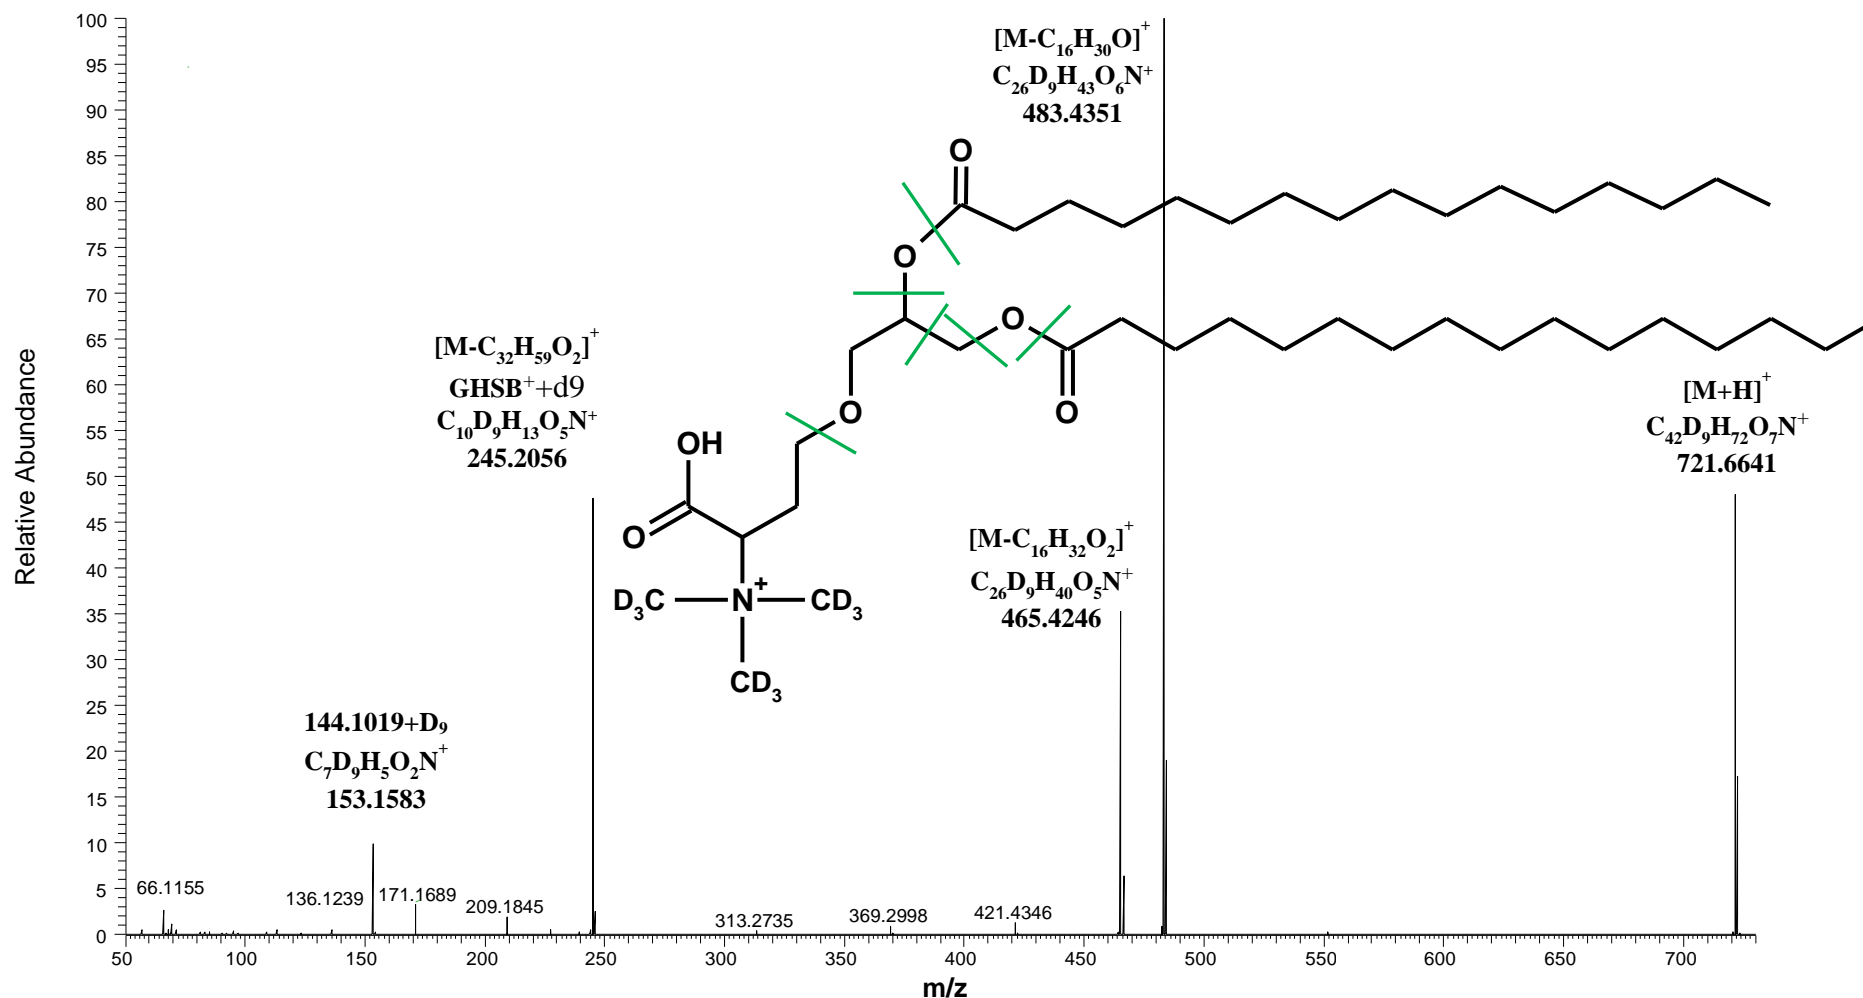

The MS/MS spectrum of the reference **DGTS-d9 (16:0, 16:0)** standard showing the characteristic +d9 mass shifts (masses 144+9, 236+9) for the GSHB headgroup, refer also to E). The absence of the distinct  $m/z$   $C_6H_8N^+$  ( $m/z$  101.1121), compare with D), further proves the massive production of MGTA and DGTA by *D. papillatum*. Typical acyl derived diagnostic ions  $m/z$  483.4351 (a hexadecyl ketene group loss, - 238.2291, i.e. a  $C_{16}H_{30}O$  loss) and  $m/z$  465.4246 (- hexadecanoic acid, -256.397, a  $C_{16}H_{32}O_2$  loss) prove the presence of C16:0 acyls in the nonadeuterium labeled betaine lipid.

M) PC (20:5, 22:5), eicosapentaenoyl-docosapentaenoyl-glycerophosphocholine, posESI HRMS, CID MS/MS spectrum, MH+ = 854.57 →

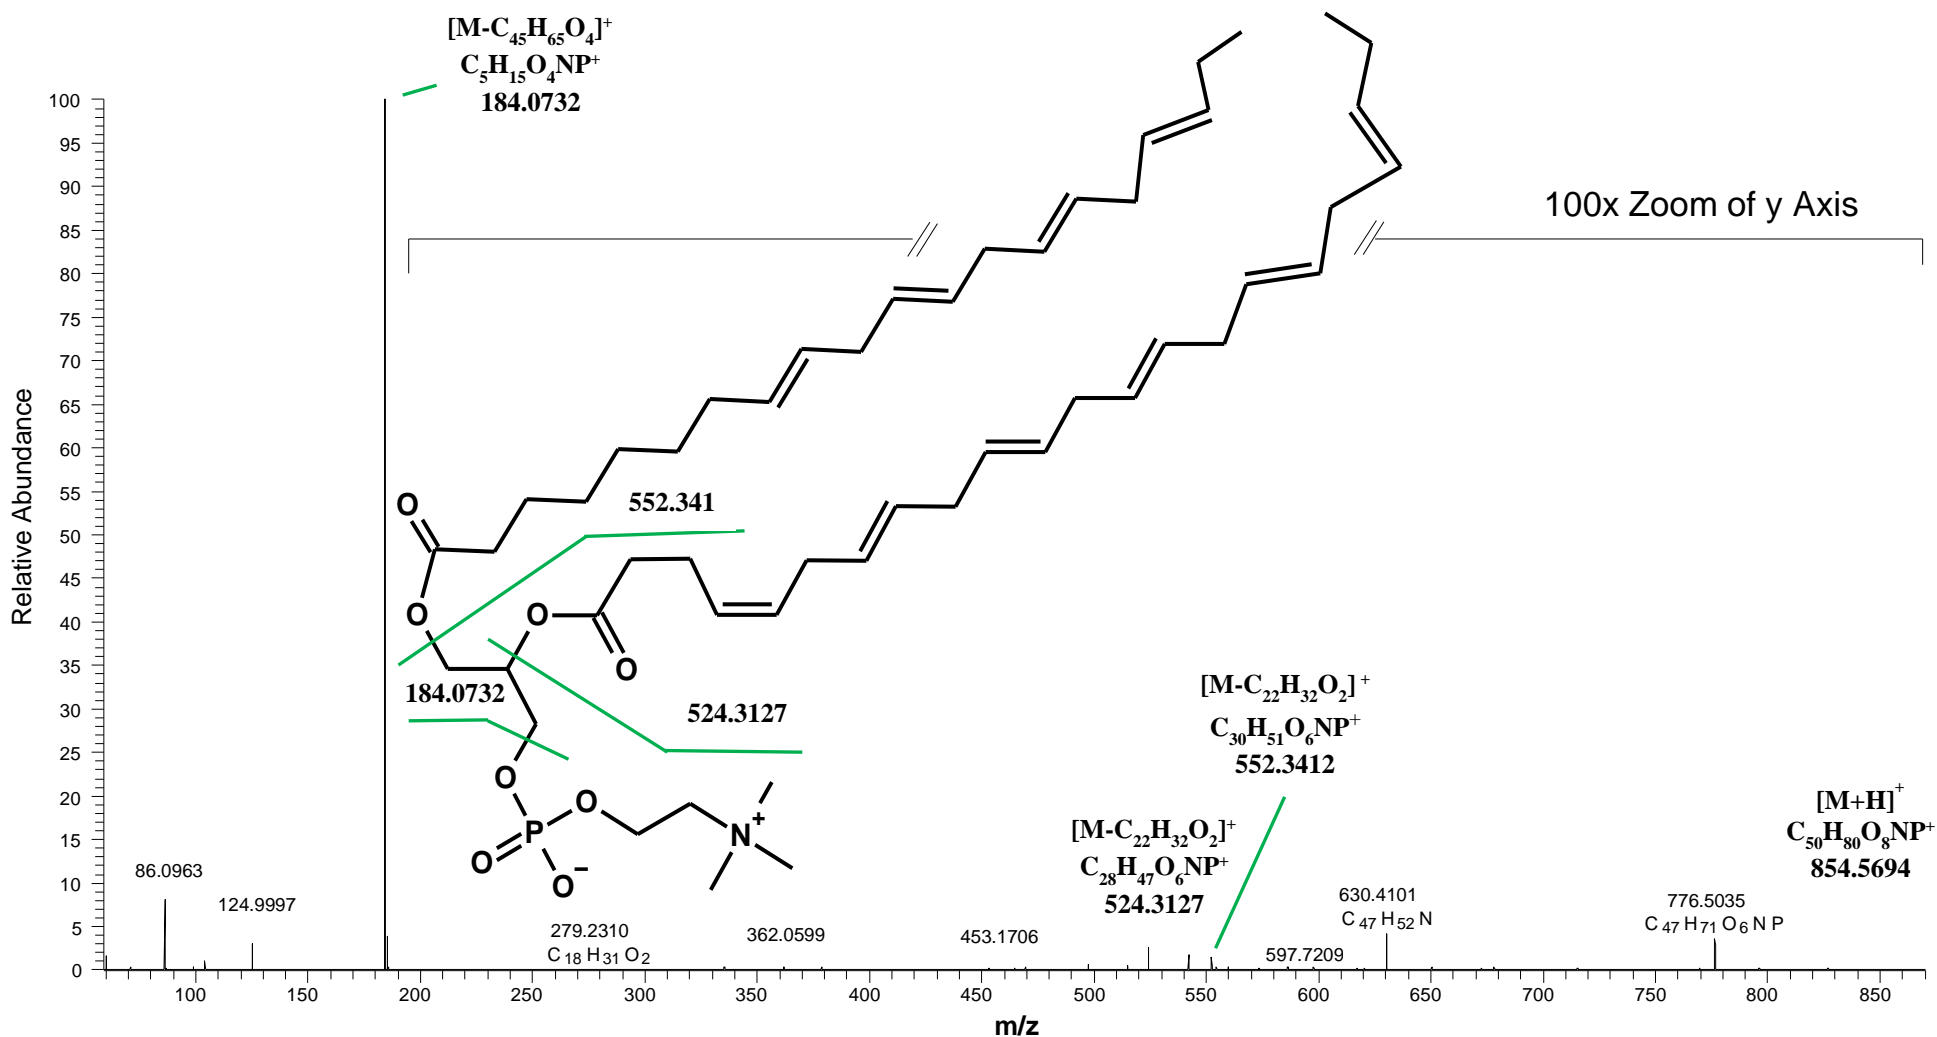

The MS/MS spectrum of the largest detected PC (C20:5, 22:5) highly abundant in a pooled R+/R- sample. The detected very weak fragment ions m/z 524.3127 and 552.3412 indicate a respective loss of the C20:5 (-C<sub>22</sub>H<sub>32</sub>O<sub>2</sub>) and C22:5 (C<sub>20</sub>H<sub>30</sub>O<sub>2</sub>) acids, which corresponds well to the largest detected circulated free fatty acids, refer to Additional file 4: Table S2.
